# Supplementary material for: How do cancer-sniffing dogs sort biological samples? Exploring case-control samples with non-targeted LC-Orbitrap, GC-MS, and immunochemistry methods
Source: PubMed Central journal article supplement (PMC8649743; doi:10.1088/1752-7163/ab433a), 2019-11-19
Supplement: NIHMS1544864-supplement-Sup1.pdf [file NIHMS1544864-supplement-Sup1.pdf]

## Supplemental Information

How do cancer-sniffing dogs sort biological samples? Exploring case-control samples with non-targeted LC-Orbitrap, GC-MS and immunochemistry methods

### 1. LC-MS Supplemental Sample Analysis Methods

Sub-aliquots of 100  $\mu\text{L}$  volume were removed from the MS designated samples in methanol and diluted with 300  $\mu\text{L}$  of 2 mM ammonium formate. Sample order was randomized prior to analysis and two injection replicates were performed for each prepared sample. Double blank samples consisting of 100  $\mu\text{L}$  laboratory MeOH and 300  $\mu\text{L}$  of 2mM ammonium formate were analyzed every five injections to check for substantive carryover between samples. A 25  $\mu\text{L}$  injection of the diluted samples was separated on a Vanquish UPLC (Thermo Scientific) system equipped with an Accucore Vanquish C18+ column (100 x 2.1 mm, 1.5  $\mu\text{m}$  particle diameter) coupled to an Orbitrap Fusion (Thermo Electron) for data collection. The chromatographic gradient consisted of a single linear gradient from 25-100% B over 18 min, with mobile phases A: 95/5 H<sub>2</sub>O/MeOH (0.1% formic acid) and B: 95/5 MeOH/H<sub>2</sub>O (0.1% formic acid) and a flow rate of 300  $\mu\text{L}/\text{min}$ . Columns were flushed for 3 min with 100% B after each sample and equilibrated with 25% B prior to the next injection.

MS data were collected with both positive and negative electrospray ionization in data-dependent MS/MS mode with a 0.6 s cycle time. Electrospray ionization used the HESI source and conditions were, in positive mode: 3.0 kV spray voltage, sheath gas 11 (arb), aux gas 4 (arb), sweep gas 0 (arb), ion transfer tube 350 °C, vaporizer temperature 275 °C. MS1 data were collected at 120,000 nominal resolving power, RF lens 45, automatic gain control (AGC) target 5e5, maximum injection time 250 ms, and a mass range of 150-1500 Da.

Data-dependent acquisition was based on monoisotopic precursor selection using a small molecule model, with threshold abundance of 2e4 and a 6 s dynamic exclusion after MS/MS selection.

MS/MS data were collected at 15,000 nominal resolution in the orbitrap analyzer with a 1.6 Da quadrupole isolation window, stepped HCD collision energy of 35 +/- 1, fixed first mass of 80 Da. The AGC target was 5e4 with ions injected for all maximum parallelizable time (22 ms).

### 2. GC-MS Supplemental Data

A total of 44 detected features were used to build the OPLS-DA model, as shown in Figure S1. The GC classification model was not statistically significant (pR<sup>2</sup> = 0.45, PQ2Y = 0.80). This strengthens the need for a model validation processes (Wehrens 2011) and is an example of potential over-modeling, sometimes referred to as “voodoo correlation”, which is an effect that is identified by randomizing the training set repeatedly and observing similar results.

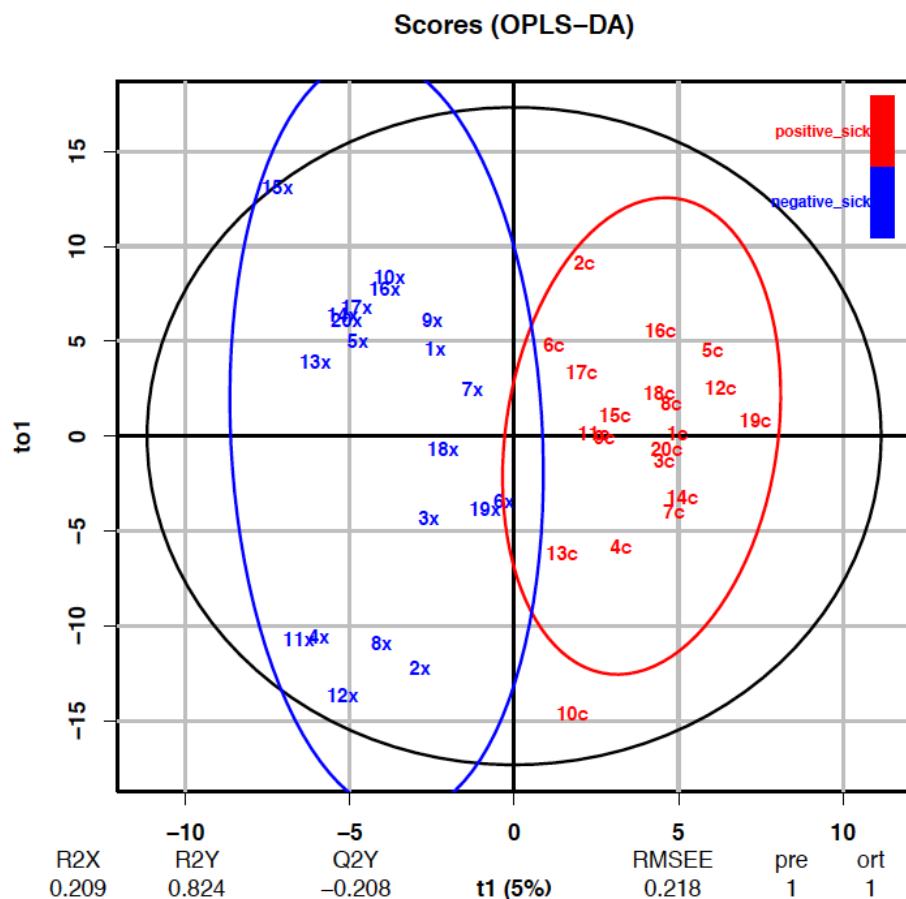

Figure S1: OPLS-DA classification model using 44 GC-MS features.  $pR^2 = 0.45$ ,  $PQ^2Y = 0.80$  from 1000 bootstrap replicates. T1 is the predictive component and TO1 is the orthogonal component. Positive\_sick (red c) are the cases and negative\_sick (blue x) are the control samples.
